# Supplementary material for: First-principles study of the effect of compressive strain on oxygen adsorption in Pd/Ni/Cu-alloy-core@Pd/Ir-alloy-shell catalysts
Source: Royal Society of Chemistry journal article supplement (doi:10.1039/c9nj01705d), 2019-01-01
Supplement: c9nj01705d1.pdf [file c9nj01705d1.pdf]

## *Supporting Information*

### **First-principles study of the effect of compressive strain on oxygen adsorption in Pd/Ni/Cu-alloy-core@Pd/Ir-alloy-shell catalysts**

Jeffrey Roshan De Lile<sup>1</sup>, So Young Lee<sup>2</sup>, Hyoung-Juhn Kim<sup>2</sup>, Chanho Pak<sup>3,\*</sup> and  
Seung Geol Lee<sup>1,\*</sup>

<sup>1</sup> *Department of Organic Material Science and Engineering, Pusan National University 2, Busandaehak-ro 63beon-gil, Geumjeong-gu, Busan 46241, Korea*

<sup>2</sup> *Fuel Cell Research Center, Korea Institute of Science and Technology, Hwarang-ro 14-gil 5, Seongbuk-gu, Seoul 02792, Republic of Korea*

<sup>3</sup> *Graduate Program of Energy Technology, School of Integrated Technology, Institute of Integrated Technology, Gwangju Institute of Science and Technology, 123 Cheomdangwagi-ro, Buk-gu, Gwangju, 61005, Korea*

---

\*Corresponding authors:

seunggeol.lee@pusan.ac.kr (S.G. Lee)

chanho.pak@gist.ac.kr (C. Pak)

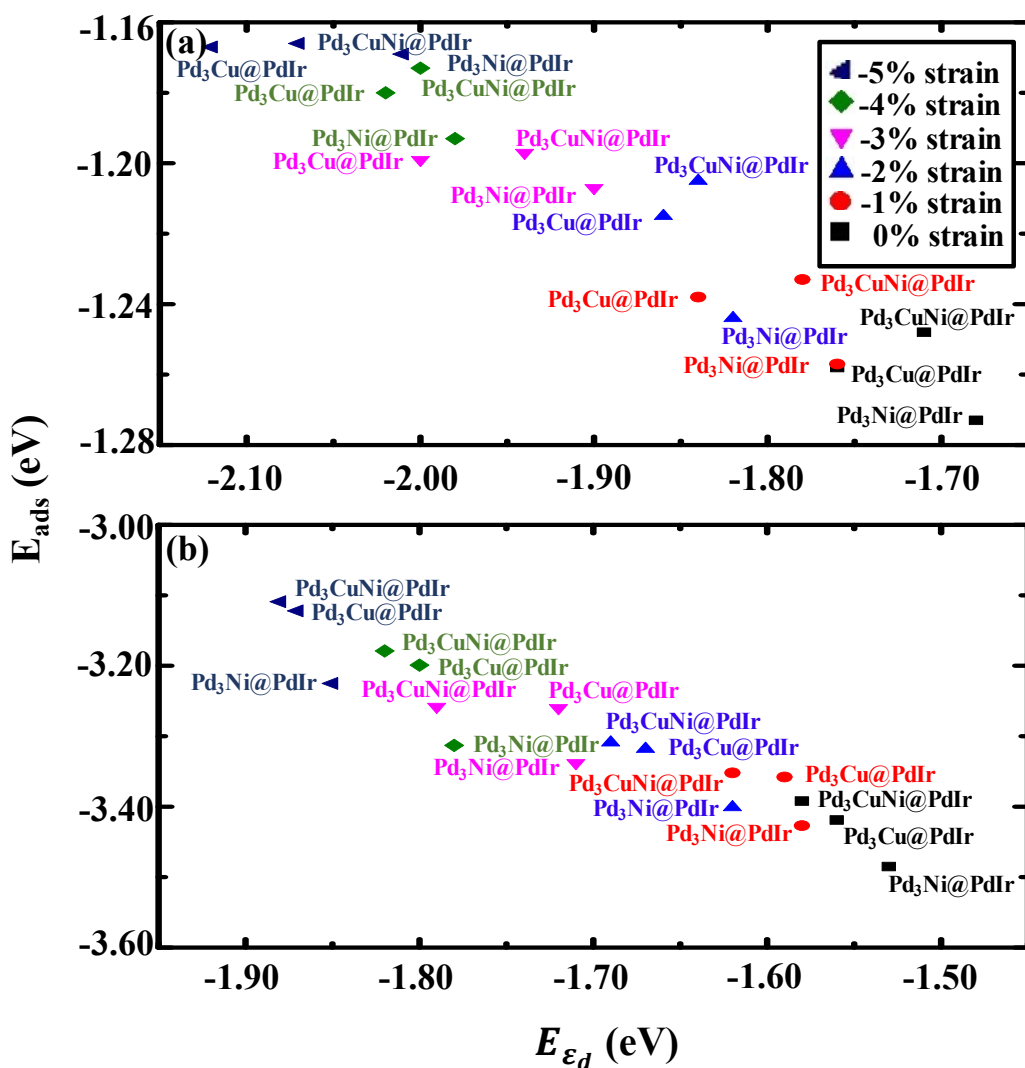

**Figure S1.** Dioxygen-adsorption energy as a function of d-band center for (a) surface Pd and (b) surface Ir at different compressive strains. This figure clearly demonstrates lower dioxygen binding to the catalyst surface with increasing compressive strain and d-band center downshift. Individual catalysts are labelled according compressive strain for clarity.

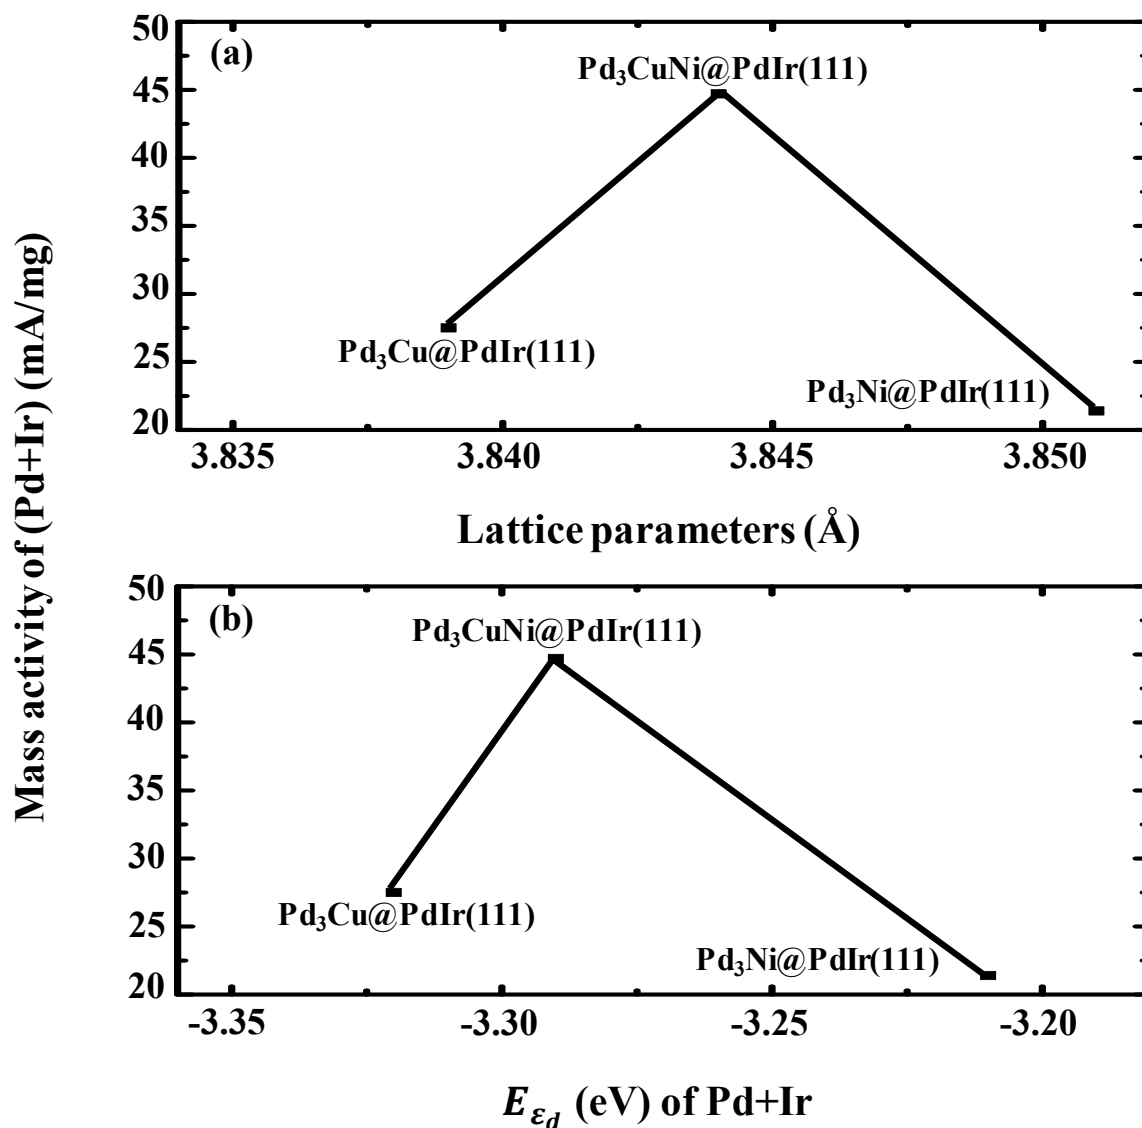

**Figure S2.** Volcano plots based on the experimentally obtained mass activity as a function of: (a) experimentally determined lattice parameter and (b) theoretically calculated d-band center value for the Pd and Ir surfaces. Both figures show similar trends, with the  $\text{Pd}_3\text{CuNi@PdIr}$  catalyst at the apex of the volcano, the  $\text{Pd}_3\text{Cu@PdIr}$  catalyst at the left-hand side and the  $\text{Pd}_3\text{Ni@PdIr}$  catalyst at the right-hand side of the apex. Note: the black lines are provided for guidance purposes.
